# Supplementary material for: Coumarin derivatives for dye sensitized solar cells: a TD-DFT study
Source: Royal Society of Chemistry journal article supplement (doi:10.1039/c1cp22058f), 2011-11-11
Supplement: c1cp22058f.pdf [file c1cp22058f.pdf]

## SUPPORTING INFORMATION

### 1. Effect of the exchange-correlation functional and the solvent on the calculated absorption spectra.

| DYE      | Exp. <sup>1</sup> | This work          |                      | Stein <sup>2</sup>  | Kurashige <sup>3</sup> |      |                       | Wong <sup>4</sup>       |
|----------|-------------------|--------------------|----------------------|---------------------|------------------------|------|-----------------------|-------------------------|
|          |                   | PBE<br>6-31G (d,p) | B3LYP<br>6-31G (d,p) | BNL<br>6-31+G (d,p) | CC2                    | CIS  | B3LYP<br>6-31+G (d,p) | LC-BLYP<br>6-31+G (d,p) |
| C343     | 2.81              | 3.00               | 3.40                 | 3.4                 | 3.44                   | 4.40 | 3.32                  | 3.36                    |
| NKX-2311 | 2.46              | 2.35               | 2.63                 | 2.6                 | 2.71                   | 3.50 | 2.56                  | 2.73                    |
| NKX-2586 | 2.45              | 2.15               | 2.45                 | 2.5                 | 2.66                   | 3.34 | 2.40                  | 2.66                    |

**Table 1.** Experimental and computed maximum absorption band energies (eV) for free C343, NKX-2311 and NKX-2586.

<sup>1</sup> K. Hara, T. Sato, R. Katoh, A. Furube, Y. Ohga, A. Shinpo, S. Suga, K. Sayama, H. Sugihara, and H. Arakawa, *J. Phys. Chem. B*, 2003, **107**, 597.

<sup>2</sup>Stein, T.; Kronik, L.; Baer, R. *J. Chem. Phys.* **2009**, *131*, 244119.

<sup>3</sup>Kurashige, Y.; Nakajima, T.; Kurashige, S.; Hirao, K. *J. Phys. Chem. A* **2007**, *111*, 5544.

<sup>4</sup>Wong, B. M.; Cordaro, J. G. *J. Chem. Phys.* **2008**, *129*, 21403.

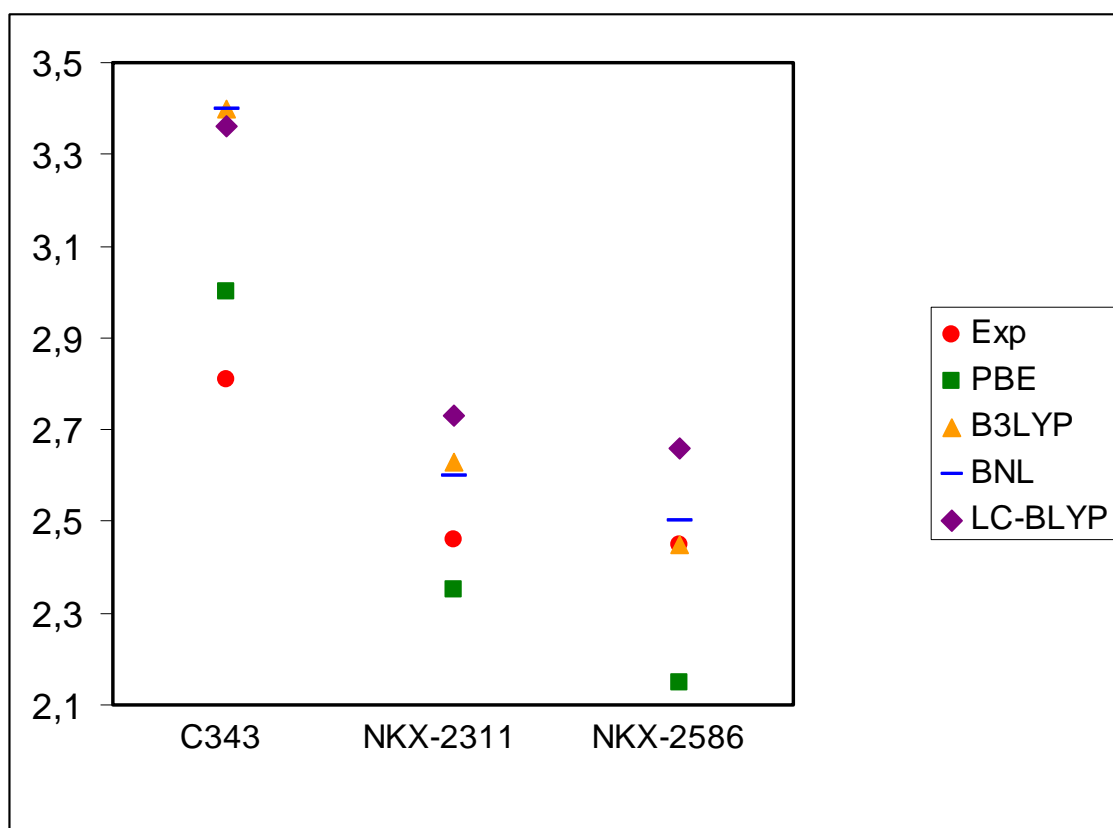

**Figure 1.** Experimental (Hara) and computed maximum absorption band energies (eV) for free C343, NKX-2311 and NKX-2586. TD-DFT excitation energies calculated with different exchange-correlation functionals are compared: PBE (this work), B3LYP (this work), BNL (Stein) and LC-BLYP (Wong).

| Dye      | B3LYP (Gas phase) | B3LYP (Methanol) | PBE (Gas phase) | PBE (Methanol) |
|----------|-------------------|------------------|-----------------|----------------|
| C343     | 3.40              | 3.15             | 3.00            | 2.82           |
| NKX-2311 | 2.63              | 2.42             | 2.35            | 2.18           |
| NKX-2586 | 2.45              | 2.20             | 2.15            | 1.95           |

**Table 2.** Maximum absorption band energies (eV) for free C343, NKX-2311 and NKX-2586 calculated with and without solvent effects (Methanol, PCM).

In figure 1 and table 1 the maximum absorption energies calculated with different methods have been compared for three free dyes: C343, NKK-2311 and NKX-2586. Experimental energies have been also included. In this work we have done PBE and B3LYP calculations for these three free dyes using 6-31G (d,p) basis set. PBE provides better results than B3LYP for C343 and NKX-2311 while B3LYP works better when the molecule size increases (NKX-2586). For these molecules the inclusion of long range corrections in the functional (LC-BLYP or BNL vs. B3LYP) has a very little influence on the results and in the case of NKX-2586 results obtained with these corrected functionals are even worse than B3LYP results. The inclusion of an additional diffuse base functions (B3LYP/6-31G (d,p).vs. B3LYP/6-31+G (d,p)) also has a little effect on the results (less than 0.08 eV) at a considerable computational effort. As it has been said before, CIS method always overestimates the excitation energies and CC2 provide, for the studied molecules, results similar to B3LYP, but with a much more computational effort. There is not previously published data about calculations on NKX-2753 and NKX-2593. Nevertheless, these molecules have a similar size to NKX-2586 and might share the same technical shortcomings.

We can conclude that, although as a general statement the use of long range corrected B3LYP and an additional diffuse base functions might be a better choice for dye molecules, for these particular dyes they do not improve substantially the results. This is a consequence of the kind of excitation we are dealing with. Since this kind of molecules work on an indirect mechanism (intramolecular excitation followed by a charge transfer to the conduction band of the semiconductor), the charge transfer character of the excitation is moderate.

We have also done preliminary calculations in order to estimate the effect of the inclusion of a solvent on the absorption spectra of free dyes. We have done the frequency domain TD-DFT calculations for the free dyes using PBE and B3LYP and with and without methanol solvent effects (PCM model). Results are shown in Table 2. In all cases, the inclusion of solvent effects red shifts the first transition about 0.15-0.20 eV, but that does not improve necessarily the result with respect to the experimental values as can be seen from Table 2. Even considering the solvent effects, PBE reproduces better C343 experimental spectrum, while B3LYP with solvent effects reproduces better NKX-2311 and NKX-2586 experimental data.

## 2. Study of the different bidentate adsorption modes and its influence on the electronic absorption spectra.

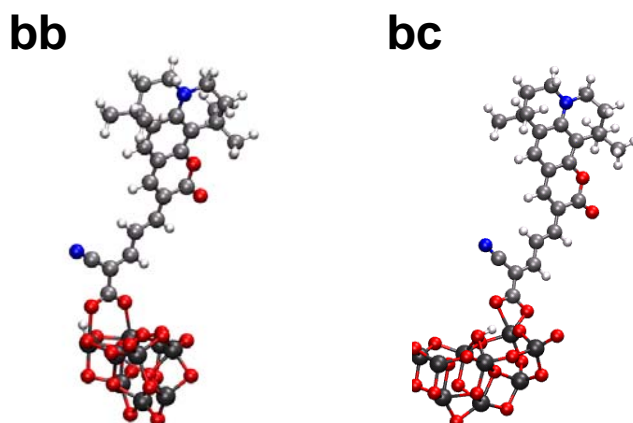

**Figure 2.** Two bidentate adsorption modes for NKX-2311 on (TiO<sub>2</sub>)<sub>9</sub> are possible: bidentate bridging (bb) structure with both dye oxygen atoms bound to two cluster titanium atoms or a bidentate structure with the two dye oxygens bound to the same cluster titanium atom, in a chelating configuration (bc). For all considered dyes the most stable adsorption mode is the bidentate chelating configuration (bc), with the dissociated hydrogen bound to an oxygen in the centre of the cluster.

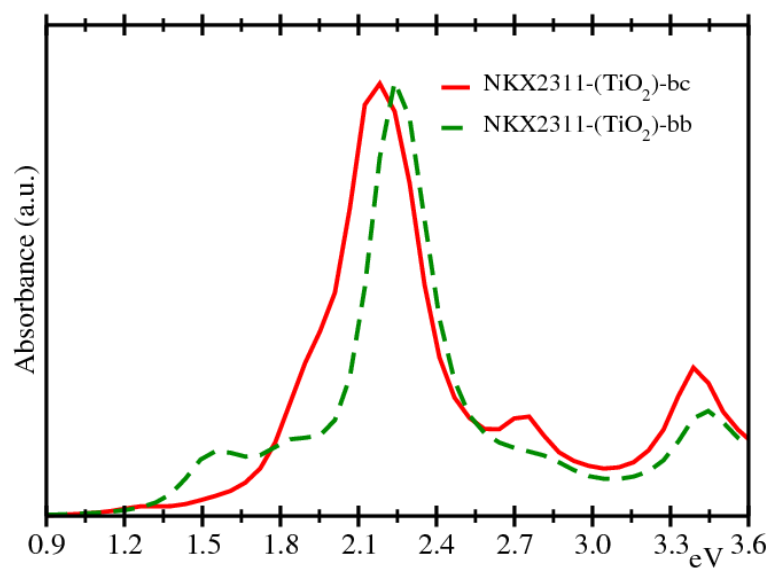

**Figure 3.** RT-TDDFT spectra for adsorbed NKX-2311 in its two possible bidentate adsorption modes (bb and bc). The absorption maximum position in the spectra is almost not affected by the adsorption mode (differences less than 0.07 eV). Nevertheless, for the bidentate bridging structure (bb) a new band at lower energy appears in the simulated spectrum, which is not present in the experimental spectrum.

### 3. Geometric data

Optimized geometries for free and adsorbed dyes

FREE C343

|   |           |           |           |
|---|-----------|-----------|-----------|
| C | 0.227180  | -5.949616 | -0.115580 |
| C | -1.158575 | -5.911512 | -0.111791 |
| C | -1.131332 | -3.480363 | 0.024342  |
| C | -0.854669 | -0.977913 | 0.199701  |
| C | 0.924395  | -7.273963 | -0.163899 |
| C | 0.976407  | -4.716416 | -0.076338 |
| C | -1.871455 | -4.689596 | -0.055624 |
| C | -1.717589 | -2.216849 | 0.111441  |
| C | -1.638366 | 0.273776  | -0.199051 |
| C | -3.285138 | -4.575848 | -0.077686 |
| C | -3.144614 | -2.144645 | 0.104163  |
| C | -2.998544 | 0.291842  | 0.495749  |
| C | -3.928656 | -3.349761 | -0.002514 |
| C | -5.440249 | -3.272507 | -0.019293 |
| C | -5.229251 | -0.793431 | 0.222381  |
| C | -5.910816 | -1.918221 | -0.552576 |
| N | -3.769646 | -0.914915 | 0.184693  |
| O | 0.306077  | -8.340618 | -0.199905 |
| O | 0.253778  | -3.522363 | 0.012576  |
| O | 2.216882  | -4.598730 | -0.111905 |
| O | 2.279912  | -7.234901 | -0.156013 |
| H | -0.464944 | -0.872576 | 1.224376  |
| H | 0.030795  | -1.103567 | -0.436225 |
| H | -1.790631 | 0.293524  | -1.286274 |
| H | -1.687238 | -6.865627 | -0.153314 |
| H | -1.079994 | 1.179694  | 0.067339  |
| H | 2.580431  | -6.271754 | -0.142170 |
| H | -3.589501 | 1.155245  | 0.161564  |
| H | -2.872495 | 0.389515  | 1.588294  |
| H | -3.878927 | -5.487913 | -0.158440 |
| H | -5.490422 | 0.181304  | -0.213831 |
| H | -5.843268 | -4.092590 | -0.628570 |
| H | -5.833629 | -3.425366 | 0.998109  |
| H | -5.584164 | -0.778991 | 1.267812  |
| H | -5.664626 | -1.828868 | -1.619543 |
| H | -6.999180 | -1.816151 | -0.455973 |

### ADSORBED C343

|    |           |           |           |
|----|-----------|-----------|-----------|
| Ti | 15.618100 | 4.915257  | 15.538679 |
| Ti | 14.656039 | 6.531828  | 13.342110 |
| Ti | 17.613459 | 6.270851  | 13.085940 |
| Ti | 14.907321 | 7.679475  | 15.895440 |
| Ti | 20.753710 | 6.862666  | 12.242809 |
| Ti | 18.144937 | 4.270597  | 15.519405 |
| Ti | 20.762607 | 5.138394  | 14.770070 |
| Ti | 17.901846 | 7.483138  | 15.838273 |
| Ti | 21.136004 | 8.061333  | 15.539596 |
| O  | 14.320878 | 4.940144  | 14.100751 |
| O  | 16.506931 | 3.427434  | 16.089748 |
| O  | 15.998929 | 6.523090  | 12.119939 |
| O  | 16.415538 | 8.474763  | 16.506535 |
| O  | 13.865553 | 7.895651  | 14.349067 |
| O  | 14.579851 | 6.088665  | 16.664016 |
| O  | 21.360157 | 5.298375  | 13.036662 |
| O  | 17.128385 | 4.584195  | 13.950862 |
| O  | 19.874559 | 3.641029  | 15.478823 |
| O  | 19.052090 | 5.949794  | 14.729390 |
| O  | 21.668387 | 6.233360  | 15.834641 |
| O  | 18.970420 | 6.233881  | 11.961490 |
| O  | 17.978321 | 8.085584  | 13.904925 |
| O  | 20.702593 | 8.038422  | 13.605830 |
| O  | 17.393451 | 5.716852  | 16.531218 |
| O  | 22.237354 | 9.179450  | 15.984697 |
| O  | 19.397398 | 8.197210  | 16.403101 |
| O  | 16.051565 | 6.719305  | 14.671194 |
| O  | 21.750064 | 10.977763 | 7.818746  |
| O  | 19.928599 | 10.149762 | 8.841768  |
| O  | 20.292882 | 8.046682  | 10.580991 |
| O  | 22.342746 | 7.399126  | 11.052910 |
| C  | 22.067730 | 9.112799  | 9.350390  |
| C  | 23.427587 | 9.141071  | 9.049714  |
| C  | 23.092096 | 11.006084 | 7.525572  |
| C  | 21.138093 | 10.044007 | 8.713744  |
| C  | 23.971206 | 10.061655 | 8.127870  |
| C  | 23.524496 | 11.996380 | 6.642917  |
| C  | 23.050500 | 13.441947 | 4.673815  |
| C  | 25.343916 | 10.127230 | 7.764021  |
| C  | 24.908797 | 12.030098 | 6.299949  |
| C  | 24.484347 | 13.951917 | 4.769786  |
| C  | 25.820627 | 11.060460 | 6.859301  |
| C  | 26.801607 | 13.165466 | 5.128406  |
| C  | 21.550694 | 8.168354  | 10.328011 |
| C  | 27.704315 | 12.549258 | 6.192021  |
| C  | 27.275359 | 11.102406 | 6.453262  |
| C  | 22.558322 | 12.994883 | 6.051995  |
| N  | 25.376016 | 12.990785 | 5.432200  |

|   |           |           |           |
|---|-----------|-----------|-----------|
| H | 22.413906 | 14.237711 | 4.266500  |
| H | 24.082499 | 8.424917  | 9.548800  |
| H | 23.006638 | 12.598198 | 3.972029  |
| H | 24.516491 | 14.911911 | 5.313429  |
| H | 24.893090 | 14.140838 | 3.766306  |
| H | 26.990896 | 14.246344 | 5.044021  |
| H | 27.019301 | 12.725618 | 4.139700  |
| H | 27.634504 | 13.131832 | 7.120368  |
| H | 28.745212 | 12.601285 | 5.849709  |
| H | 18.931330 | 8.328481  | 13.694503 |
| H | 26.036868 | 9.411586  | 8.209781  |
| H | 22.464664 | 13.866216 | 6.719984  |
| H | 21.557842 | 12.551774 | 5.993305  |
| H | 27.894906 | 10.639793 | 7.232625  |
| H | 27.428024 | 10.506762 | 5.538499  |



FREE NKX-2311

|   |           |            |           |
|---|-----------|------------|-----------|
| C | 0.271203  | -0.799692  | 1.319622  |
| C | -0.382158 | -0.170734  | -1.033264 |
| C | 0.573109  | -5.620532  | -0.406409 |
| C | -0.821298 | -5.651878  | -0.360889 |
| C | -0.970483 | -3.228023  | -0.100436 |
| C | -0.906386 | -0.695948  | 0.321566  |
| C | 1.414466  | -6.786300  | -0.475240 |
| C | 1.243943  | -4.321339  | -0.350700 |
| C | -1.611074 | -4.491130  | -0.217897 |
| C | -1.655401 | -2.024778  | 0.116067  |
| C | -1.880480 | 0.323688   | 0.945618  |
| C | 0.994525  | -8.100303  | -0.518400 |
| C | -3.026577 | -4.515552  | -0.161974 |
| C | -3.096994 | -2.091508  | 0.098929  |
| C | -3.213067 | 0.383169   | 0.228719  |
| C | 1.914165  | -9.181750  | -0.513538 |
| C | -3.782362 | -3.365300  | -0.023101 |
| C | 1.577523  | -10.529001 | -0.538739 |
| C | -5.311101 | -3.443743  | 0.018643  |
| C | -5.304316 | -0.914029  | 0.110184  |
| C | 0.214358  | -10.936581 | -0.587914 |
| C | 2.665818  | -11.524469 | -0.506336 |
| C | -5.857172 | -4.618485  | -0.814042 |
| C | -5.780598 | -3.606190  | 1.481904  |
| C | -5.861753 | -2.140612  | -0.589024 |
| N | -3.841553 | -0.935491  | 0.189131  |
| N | -0.938831 | -11.195155 | -0.626877 |
| O | 0.405972  | -3.184853  | -0.218900 |
| O | 2.451681  | -4.102047  | -0.410356 |
| O | 2.204244  | -12.817234 | -0.560462 |
| O | 3.871363  | -11.261825 | -0.438670 |
| H | 0.617613  | 0.216175   | 1.557141  |
| H | 0.336785  | -0.872356  | -1.471063 |
| H | -0.046971 | -1.271692  | 2.258572  |
| H | 2.487122  | -6.584946  | -0.478866 |
| H | -1.412886 | 1.317874   | 0.937381  |
| H | -1.192721 | -0.025938  | -1.759873 |
| H | 0.127451  | 0.793129   | -0.891846 |
| H | 1.119100  | -1.360320  | 0.921955  |
| H | -1.334724 | -6.613550  | -0.418607 |
| H | -2.057350 | 0.058332   | 1.998204  |
| H | 2.985729  | -8.971245  | -0.473834 |
| H | -3.103166 | 0.773385   | -0.797972 |
| H | -3.898262 | 1.060984   | 0.755529  |
| H | -0.070581 | -8.346464  | -0.543174 |
| H | -3.518011 | -5.484071  | -0.249491 |
| H | -5.477129 | -4.590849  | -1.843479 |
| H | -5.591382 | -0.006340  | -0.439124 |

|   |           |            |           |
|---|-----------|------------|-----------|
| H | -5.398713 | -2.808964  | 2.132366  |
| H | -5.602774 | -5.593986  | -0.381083 |
| H | -5.421208 | -4.558027  | 1.893043  |
| H | 2.996792  | -13.398743 | -0.539407 |
| H | -5.724635 | -0.814186  | 1.125032  |
| H | -5.600085 | -2.103417  | -1.656205 |
| H | -6.958337 | -2.127888  | -0.522058 |
| H | -6.952956 | -4.563684  | -0.854611 |
| H | -6.879033 | -3.602126  | 1.540177  |

### ADSORBED NKX-2311

|    |           |           |           |
|----|-----------|-----------|-----------|
| Ti | 25.477280 | -2.841004 | 14.327337 |
| Ti | 27.702453 | -1.024400 | 14.028550 |
| Ti | 25.185550 | 0.432625  | 13.350734 |
| Ti | 27.210814 | -2.936655 | 12.028440 |
| Ti | 23.099910 | 2.616704  | 12.032520 |
| Ti | 23.071512 | -1.868490 | 14.041095 |
| Ti | 21.504688 | 0.081693  | 12.658739 |
| Ti | 24.618396 | -1.631053 | 11.211204 |
| Ti | 22.256619 | 0.103610  | 9.702259  |
| O  | 27.013934 | -2.131507 | 15.262237 |
| O  | 23.893041 | -3.227080 | 15.133777 |
| O  | 26.947838 | 0.633978  | 14.019361 |
| O  | 26.112251 | -2.659213 | 10.616674 |
| O  | 28.664672 | -1.999707 | 12.759905 |
| O  | 26.520335 | -4.055202 | 13.253078 |
| O  | 21.625512 | 1.908308  | 12.901178 |
| O  | 24.551369 | -0.857742 | 14.669449 |
| O  | 21.353423 | -1.210832 | 14.013333 |
| O  | 23.314689 | -0.457480 | 12.547092 |
| O  | 20.908246 | -0.274440 | 11.026995 |
| O  | 24.351235 | 1.986986  | 13.330465 |
| O  | 25.438021 | 0.214435  | 11.352540 |
| O  | 23.205363 | 1.621904  | 10.541952 |
| O  | 24.040912 | -2.800932 | 12.674773 |
| O  | 21.686547 | 0.398967  | 8.202452  |
| O  | 23.514438 | -1.374306 | 9.877400  |
| O  | 26.208458 | -1.542528 | 12.917830 |
| O  | 23.134909 | 12.243038 | 6.817866  |
| O  | 21.478744 | 11.376100 | 8.064048  |
| O  | 24.739594 | 3.908130  | 11.563535 |
| O  | 22.624847 | 4.546316  | 11.537198 |
| C  | 22.348255 | 13.379778 | 4.362303  |
| C  | 23.259803 | 15.270814 | 5.760127  |
| C  | 23.639622 | 10.308968 | 8.224906  |
| C  | 24.968655 | 10.440018 | 7.809909  |
| C  | 24.430530 | 12.315462 | 6.348174  |
| C  | 23.628219 | 14.155877 | 4.756663  |
| C  | 23.156318 | 9.245377  | 9.062602  |
| C  | 22.661578 | 11.286570 | 7.748935  |
| C  | 25.392402 | 11.423978 | 6.896116  |
| C  | 24.726517 | 13.265276 | 5.364433  |
| C  | 24.160476 | 14.763278 | 3.444088  |
| C  | 23.944569 | 8.229083  | 9.563657  |
| C  | 26.734568 | 11.553841 | 6.457542  |
| C  | 26.114246 | 13.392155 | 4.982994  |
| C  | 25.545890 | 15.361063 | 3.586595  |
| C  | 23.474087 | 7.093207  | 10.265344 |
| C  | 27.126231 | 12.509946 | 5.538522  |

|   |           |           |           |
|---|-----------|-----------|-----------|
| C | 24.330309 | 6.068477  | 10.663985 |
| C | 28.597651 | 12.605057 | 5.115585  |
| C | 27.875157 | 14.526056 | 3.629985  |
| C | 25.733777 | 6.163879  | 10.408456 |
| C | 23.887681 | 4.828711  | 11.278364 |
| C | 29.555826 | 12.286957 | 6.280406  |
| C | 28.868927 | 11.610299 | 3.964729  |
| C | 28.879103 | 14.049819 | 4.664832  |
| N | 26.494876 | 14.370549 | 4.093482  |
| N | 26.880030 | 6.311819  | 10.160448 |
| H | 21.728437 | 14.025883 | 3.725120  |
| H | 22.871068 | 14.835944 | 6.688284  |
| H | 22.591980 | 12.477910 | 3.785810  |
| H | 22.084163 | 9.250373  | 9.264489  |
| H | 23.460711 | 15.535482 | 3.096538  |
| H | 24.125525 | 15.894883 | 6.018897  |
| H | 22.481174 | 15.921419 | 5.337516  |
| H | 21.748241 | 13.084005 | 5.224643  |
| H | 25.721543 | 9.741544  | 8.179487  |
| H | 24.189733 | 13.982140 | 2.670440  |
| H | 22.410173 | 6.972974  | 10.479596 |
| H | 25.538142 | 16.239374 | 4.254414  |
| H | 25.913224 | 15.704899 | 2.610659  |
| H | 25.019155 | 8.248481  | 9.371068  |
| H | 29.337525 | 12.906373 | 7.159837  |
| H | 28.031907 | 15.591474 | 3.415248  |
| H | 28.219523 | 11.785700 | 3.097567  |
| H | 29.513461 | 11.234147 | 6.584769  |
| H | 28.688271 | 10.581398 | 4.300491  |
| H | 28.005740 | 13.988653 | 2.675065  |
| H | 28.840527 | 14.716378 | 5.538404  |
| H | 29.892851 | 14.121389 | 4.246801  |
| H | 30.590549 | 12.486745 | 5.971183  |
| H | 29.914705 | 11.680514 | 3.632060  |
| H | 24.838913 | 0.858357  | 10.873311 |
| H | 27.472082 | 10.874071 | 6.883180  |

FREE NKX-2586

|   |           |            |           |
|---|-----------|------------|-----------|
| C | 0.258009  | -0.783343  | 1.316085  |
| C | -0.395030 | -0.134919  | -1.033798 |
| C | 0.565189  | -5.617344  | -0.396782 |
| C | -0.829065 | -5.635113  | -0.354888 |
| C | -0.918100 | -0.669448  | 0.317720  |
| C | -0.974653 | -3.207447  | -0.115221 |
| C | 1.236822  | -4.316350  | -0.358577 |
| C | 1.396005  | -6.793944  | -0.479825 |
| C | -1.615983 | -4.470098  | -0.225371 |
| C | -1.661008 | -2.002970  | 0.103731  |
| C | -1.896312 | 0.343208   | 0.949362  |
| C | 0.961315  | -8.105676  | -0.495841 |
| C | -3.030219 | -4.495367  | -0.170667 |
| C | -3.103017 | -2.072290  | 0.091825  |
| C | -3.230795 | 0.402292   | 0.233759  |
| C | 1.832518  | -9.227125  | -0.588083 |
| C | -3.786117 | -3.346323  | -0.029159 |
| C | 1.395796  | -10.543661 | -0.610923 |
| C | -5.312938 | -3.429898  | 0.029897  |
| C | -5.316083 | -0.899402  | 0.105550  |
| C | 2.280794  | -11.648061 | -0.717550 |
| C | -5.759367 | -3.589171  | 1.499975  |
| C | -5.868034 | -4.610413  | -0.786773 |
| C | -5.874356 | -2.133601  | -0.579647 |
| C | 1.911982  | -12.990089 | -0.745950 |
| C | 0.539656  | -13.372100 | -0.667470 |
| C | 2.896051  | -14.081404 | -0.853338 |
| O | 0.401138  | -3.173370  | -0.241501 |
| O | 2.442982  | -4.093430  | -0.423322 |
| O | 4.194619  | -13.621171 | -0.973439 |
| O | 2.638680  | -15.287984 | -0.841945 |
| N | -3.853529 | -0.918756  | 0.187499  |
| N | -0.615172 | -13.619260 | -0.607643 |
| H | -0.060575 | -1.276692  | 2.243618  |
| H | 0.119763  | 0.825519   | -0.889190 |
| H | 0.319590  | -0.837149  | -1.477887 |
| H | 0.600501  | 0.227865   | 1.576764  |
| H | 2.470401  | -6.602786  | -0.526628 |
| H | 1.108501  | -1.333269  | 0.909168  |
| H | -1.206977 | 0.018686   | -1.756911 |
| H | -1.353927 | -6.590182  | -0.408778 |
| H | -1.433557 | 1.340275   | 0.949377  |
| H | -2.072589 | 0.069371   | 1.999993  |
| H | 2.907385  | -9.032107  | -0.647606 |
| H | -3.122959 | 0.800274   | -0.790798 |
| H | -0.107631 | -8.330191  | -0.438074 |
| H | -3.524269 | -5.462402  | -0.255182 |
| H | -3.918060 | 1.075125   | 0.765486  |

|   |           |            |           |
|---|-----------|------------|-----------|
| H | 3.349255  | -11.441884 | -0.784567 |
| H | -5.371241 | -2.790117  | 2.144036  |
| H | -5.508795 | -4.586267  | -1.823517 |
| H | -5.391687 | -4.540022  | 1.906027  |
| H | 0.323544  | -10.747243 | -0.549119 |
| H | -5.598346 | -5.581112  | -0.353421 |
| H | -5.622555 | -2.102609  | -1.649155 |
| H | -5.602665 | 0.001699   | -0.455852 |
| H | -5.737452 | -0.787117  | 1.119126  |
| H | -6.855602 | -3.588995  | 1.573440  |
| H | -6.964668 | -4.561762  | -0.804348 |
| H | -6.970069 | -2.123033  | -0.502773 |
| H | 4.760374  | -14.422958 | -1.029996 |

### ADSORBED NKX-2586

|    |           |            |           |
|----|-----------|------------|-----------|
| Ti | 24.839354 | -10.226695 | 3.369548  |
| Ti | 22.090926 | -9.847206  | 2.610665  |
| Ti | 23.509203 | -7.216088  | 2.338617  |
| Ti | 22.755606 | -10.005095 | 5.336307  |
| Ti | 24.191823 | -3.984331  | 2.052903  |
| Ti | 26.477274 | -8.227896  | 3.080660  |
| Ti | 26.701139 | -5.391370  | 3.156398  |
| Ti | 24.256274 | -7.381682  | 5.261056  |
| Ti | 25.145861 | -4.198912  | 5.483091  |
| O  | 23.461294 | -10.923155 | 2.200658  |
| O  | 26.594620 | -10.143110 | 2.920348  |
| O  | 22.082571 | -8.268365  | 1.687053  |
| O  | 23.206464 | -8.566523  | 6.337916  |
| O  | 21.300367 | -10.394630 | 4.213190  |
| O  | 24.130593 | -11.090454 | 4.936523  |
| O  | 26.001222 | -4.380009  | 1.830305  |
| O  | 24.941907 | -8.493196  | 1.971310  |
| O  | 27.731356 | -6.924750  | 2.807723  |
| O  | 25.273251 | -6.600928  | 3.504825  |
| O  | 26.867464 | -4.486686  | 4.678757  |
| O  | 23.477064 | -5.629451  | 1.491365  |
| O  | 22.819930 | -6.514516  | 4.099780  |
| O  | 24.039793 | -3.999789  | 3.857064  |
| O  | 25.624519 | -8.700238  | 4.726375  |
| O  | 25.044376 | -2.974087  | 6.557599  |
| O  | 24.712824 | -5.973367  | 6.185218  |
| O  | 23.303347 | -8.946428  | 3.810883  |
| O  | 16.986116 | 7.246202   | 1.406151  |
| O  | 16.728097 | 5.332320   | 2.551798  |
| O  | 22.646071 | -2.581238  | 1.731557  |
| O  | 24.648124 | -2.349455  | 0.850513  |
| C  | 14.579170 | 8.459546   | 0.503410  |
| C  | 15.620130 | 10.051591  | 2.159374  |
| C  | 18.708636 | 5.520303   | 1.179962  |
| C  | 19.395669 | 6.412223   | 0.352695  |
| C  | 15.577818 | 9.629455   | 0.673980  |
| C  | 17.627492 | 8.088807   | 0.520367  |
| C  | 17.441439 | 5.957182   | 1.770383  |
| C  | 19.134194 | 4.181667   | 1.492662  |
| C  | 18.894842 | 7.688618   | 0.015847  |
| C  | 16.997445 | 9.293321   | 0.180698  |
| C  | 15.021885 | 10.776066  | -0.194931 |
| C  | 20.264174 | 3.540502   | 1.021253  |
| C  | 19.573951 | 8.596713   | -0.836362 |
| C  | 17.760096 | 10.214348  | -0.627103 |
| C  | 15.992403 | 11.930464  | -0.340076 |
| C  | 20.584779 | 2.191283   | 1.329953  |
| C  | 19.055775 | 9.837667   | -1.162060 |

|   |           |           |           |
|---|-----------|-----------|-----------|
| C | 21.709898 | 1.542216  | 0.839632  |
| C | 19.821418 | 10.787410 | -2.087830 |
| C | 18.017847 | 12.500347 | -1.616853 |
| C | 22.030063 | 0.194458  | 1.124760  |
| C | 19.367156 | 10.563965 | -3.548153 |
| C | 21.345229 | 10.585291 | -2.010568 |
| C | 19.511221 | 12.225615 | -1.632072 |
| C | 23.183834 | -0.454071 | 0.682561  |
| C | 24.151803 | 0.227951  | -0.113188 |
| C | 23.481166 | -1.822000 | 1.080982  |
| N | 17.266365 | 11.473194 | -0.891710 |
| N | 24.907834 | 0.845317  | -0.779647 |
| H | 14.621618 | 8.048993  | -0.513976 |
| H | 14.611215 | 10.315147 | 2.507228  |
| H | 15.988588 | 9.230075  | 2.784199  |
| H | 13.560394 | 8.838024  | 0.667892  |
| H | 18.464199 | 3.632055  | 2.157223  |
| H | 14.753090 | 7.646265  | 1.210667  |
| H | 16.275303 | 10.917023 | 2.324177  |
| H | 20.355733 | 6.116393  | -0.075581 |
| H | 14.082612 | 11.138623 | 0.244248  |
| H | 14.781286 | 10.388842 | -1.196075 |
| H | 19.901277 | 1.639574  | 1.981661  |
| H | 16.165910 | 12.434897 | 0.626222  |
| H | 20.955760 | 4.067747  | 0.358593  |
| H | 20.542922 | 8.292882  | -1.230080 |
| H | 15.585826 | 12.687531 | -1.025247 |
| H | 21.356122 | -0.396189 | 1.749296  |
| H | 18.282006 | 10.668696 | -3.670099 |
| H | 21.710662 | 10.657479 | -0.978044 |
| H | 19.633810 | 9.551878  | -3.877200 |
| H | 22.398070 | 2.102031  | 0.201055  |
| H | 21.658756 | 9.616236  | -2.418376 |
| H | 19.923721 | 12.379310 | -0.624227 |
| H | 17.817367 | 13.463739 | -1.126187 |
| H | 17.621849 | 12.584227 | -2.642923 |
| H | 19.859132 | 11.281161 | -4.220996 |
| H | 21.850435 | 11.358678 | -2.604520 |
| H | 20.002187 | 12.948795 | -2.298217 |
| H | 22.985087 | -5.524506 | 4.096735  |



FREE NKX-2753

|   |           |            |           |
|---|-----------|------------|-----------|
| C | 0.318245  | -0.909251  | 1.337920  |
| C | -0.355467 | -0.242641  | -0.996392 |
| C | 0.346661  | -5.768577  | -0.465799 |
| C | -1.042526 | -5.717873  | -0.378614 |
| C | -0.873858 | -0.757166  | 0.364263  |
| C | -1.049809 | -3.297694  | -0.040102 |
| C | 1.093968  | -4.514855  | -0.351354 |
| C | 1.111174  | -6.978111  | -0.672014 |
| C | -1.762056 | -4.519738  | -0.172595 |
| C | -1.673465 | -2.057098  | 0.170258  |
| C | -1.806147 | 0.289293   | 1.010311  |
| C | 2.842589  | -9.451115  | -1.085577 |
| C | 3.177930  | -10.327655 | -3.425381 |
| C | 4.938709  | -10.697854 | -1.680607 |
| C | 0.588320  | -8.241982  | -0.836510 |
| C | 3.426177  | -10.600271 | -1.930791 |
| C | -3.174836 | -4.475721  | -0.077340 |
| C | -3.114764 | -2.050639  | 0.154721  |
| C | -3.132265 | 0.428201   | 0.290477  |
| C | 1.333914  | -9.447860  | -1.062867 |
| C | -3.862726 | -3.288750  | 0.093936  |
| C | 2.763030  | -11.932486 | -1.512421 |
| C | 0.634879  | -10.633249 | -1.259438 |
| C | -5.382991 | -3.259460  | 0.237309  |
| C | -5.257032 | -0.749894  | -0.028821 |
| C | 1.249887  | -11.900371 | -1.516542 |
| C | -5.748565 | -3.129199  | 1.734116  |
| C | -6.057621 | -4.518695  | -0.328491 |
| C | -5.876467 | -2.034197  | -0.557366 |
| C | 0.439078  | -13.036596 | -1.703352 |
| C | -0.982581 | -12.878085 | -1.605194 |
| C | 0.824433  | -14.436783 | -1.966386 |
| O | 0.327730  | -3.336781  | -0.150317 |
| O | 2.312638  | -4.360361  | -0.416056 |
| O | 2.166755  | -14.664642 | -2.216241 |
| O | 0.024370  | -15.379353 | -1.982875 |
| N | -3.812437 | -0.860086  | 0.200332  |
| N | -2.145084 | -12.676498 | -1.523559 |
| H | 0.013008  | -1.415232  | 2.263127  |
| H | 0.201683  | 0.695296   | -0.858680 |
| H | 0.320718  | -0.973089  | -1.455340 |
| H | 0.682017  | 0.092049   | 1.608857  |
| H | 2.192198  | -6.831964  | -0.703873 |
| H | 1.150552  | -1.465540  | 0.902348  |
| H | -1.173172 | -0.053776  | -1.704085 |
| H | -1.617441 | -6.641392  | -0.471012 |
| H | 3.679465  | -9.400708  | -3.734834 |
| H | 5.443455  | -9.766133  | -1.972146 |

|   |           |            |           |
|---|-----------|------------|-----------|
| H | -1.296071 | 1.261641   | 1.027694  |
| H | 3.225892  | -8.489638  | -1.456985 |
| H | 3.201903  | -9.536632  | -0.045421 |
| H | -1.995733 | 0.006241   | 2.056085  |
| H | 5.160273  | -10.884687 | -0.619953 |
| H | 2.109726  | -10.222019 | -3.650676 |
| H | 3.571826  | -11.146170 | -4.042057 |
| H | 5.380518  | -11.514694 | -2.267099 |
| H | -2.999192 | 0.854145   | -0.719472 |
| H | -0.497635 | -8.373583  | -0.807445 |
| H | -3.719534 | -5.416166  | -0.150545 |
| H | 3.139233  | -12.744796 | -2.139333 |
| H | -3.794134 | 1.117618   | 0.836344  |
| H | -5.245967 | -2.279317  | 2.212645  |
| H | 3.080237  | -12.179616 | -0.483442 |
| H | -5.782347 | -4.688446  | -1.377433 |
| H | -5.444568 | -4.033148  | 2.276453  |
| H | -0.455659 | -10.593055 | -1.226914 |
| H | -5.797830 | -5.418424  | 0.244280  |
| H | -5.617841 | -2.170098  | -1.61768  |
| H | -5.420942 | 0.070564   | -0.745538 |
| H | -5.743976 | -0.442067  | 0.912485  |
| H | -6.833136 | -3.003188  | 1.862831  |
| H | -7.148843 | -4.411143  | -0.277516 |
| H | -6.971001 | -1.951749  | -0.500376 |
| H | 2.237520  | -15.635169 | -2.363627 |

### ADSORBED NKX-2753

|    |           |            |            |
|----|-----------|------------|------------|
| Ti | -3.804584 | -11.843428 | 6.366145   |
| Ti | -4.518442 | -10.382530 | 3.970664   |
| Ti | -1.600285 | -10.968422 | 3.903983   |
| Ti | -4.252364 | -8.993487  | 6.400144   |
| Ti | 1.599136  | -10.829912 | 3.201809   |
| Ti | -1.363803 | -12.741298 | 6.569395   |
| Ti | 1.363245  | -12.207700 | 5.914257   |
| Ti | -1.271937 | -9.501564  | 6.530804   |
| Ti | 2.027431  | -9.283177  | 6.383054   |
| O  | -5.038453 | -11.841570 | 4.869633   |
| O  | -3.111336 | -13.348278 | 7.114618   |
| O  | -3.120802 | -10.671833 | 2.830344   |
| O  | -2.687921 | -8.306225  | 7.001895   |
| O  | -5.210465 | -8.854711  | 4.786871   |
| O  | -4.773914 | -10.454799 | 7.300061   |
| O  | 2.028449  | -12.338775 | 4.210085   |
| O  | -2.270914 | -12.497026 | 4.910142   |
| O  | 0.289760  | -13.516661 | 6.738498   |
| O  | -0.262822 | -11.261152 | 5.651657   |
| O  | 2.333943  | -11.110651 | 6.913558   |
| O  | -0.197315 | -11.248742 | 2.839151   |
| O  | -1.052179 | -9.129155  | 4.550667   |
| O  | 1.695350  | -9.540607  | 4.465583   |
| O  | -2.006475 | -11.121078 | 7.370323   |
| O  | 3.225958  | -8.242782  | 6.761101   |
| O  | 0.256048  | -8.874069  | 7.102097   |
| O  | -3.160424 | -10.186815 | 5.333757   |
| O  | 6.889528  | -8.646620  | -9.105954  |
| O  | 6.914322  | -10.691945 | -8.168150  |
| O  | 2.922791  | -11.038184 | 1.664105   |
| O  | 1.526767  | -9.329551  | 1.686090   |
| C  | 9.017446  | -7.974174  | -10.904521 |
| C  | 6.890496  | -8.113923  | -12.255796 |
| C  | 5.937837  | -8.912290  | -6.864448  |
| C  | 5.635845  | -7.550606  | -6.905703  |
| C  | 7.786429  | -7.183991  | -11.409200 |
| C  | 6.608197  | -7.293149  | -9.128197  |
| C  | 6.593988  | -9.513687  | -8.023486  |
| C  | 5.643497  | -9.782116  | -5.751251  |
| C  | 5.942726  | -6.726514  | -8.008151  |
| C  | 6.976154  | -6.556283  | -10.262404 |
| C  | 8.350824  | -6.043386  | -12.280945 |
| C  | 5.051820  | -11.646411 | -3.340731  |
| C  | 2.753786  | -12.621722 | -2.913855  |
| C  | 4.791924  | -13.800331 | -2.064759  |
| C  | 4.996495  | -9.389111  | -4.601233  |
| C  | 4.167885  | -12.423157 | -2.336521  |
| C  | 5.634397  | -5.342553  | -8.051381  |

|   |          |            |            |
|---|----------|------------|------------|
| C | 6.528090 | -5.187299  | -10.312060 |
| C | 7.302253 | -5.015803  | -12.659688 |
| C | 4.680823 | -10.188248 | -3.457217  |
| C | 5.909204 | -4.562323  | -9.159077  |
| C | 4.099175 | -11.633943 | -1.005370  |
| C | 4.010584 | -9.561301  | -2.412460  |
| C | 5.586636 | -3.068096  | -9.192033  |
| C | 6.078696 | -3.128449  | -11.673090 |
| C | 3.654631 | -10.204071 | -1.195684  |
| C | 6.870363 | -2.256224  | -8.903017  |
| C | 4.509616 | -2.664163  | -8.171880  |
| C | 5.056824 | -2.765814  | -10.607393 |
| C | 2.891634 | -9.494099  | -0.251071  |
| C | 2.419599 | -8.182423  | -0.577584  |
| C | 2.446443 | -9.966871  | 1.047497   |
| N | 6.678576 | -4.449736  | -11.466045 |
| N | 2.059398 | -7.103376  | -0.899507  |
| H | 9.608739 | -7.373075  | -10.201043 |
| H | 7.471216 | -8.547785  | -13.082130 |
| H | 6.501111 | -8.937878  | -11.647306 |
| H | 9.661391 | -8.215063  | -11.761938 |
| H | 5.973275 | -10.814904 | -5.871711  |
| H | 8.745703 | -8.910916  | -10.413228 |
| H | 6.032299 | -7.579864  | -12.684694 |
| H | 5.142371 | -7.081915  | -6.052510  |
| H | 2.793453 | -13.215749 | -3.837524  |
| H | 4.868011 | -14.385722 | -2.991575  |
| H | 8.796599 | -6.469536  | -13.190031 |
| H | 5.008844 | -12.133444 | -4.326390  |
| H | 6.106981 | -11.709326 | -3.021326  |
| H | 9.158412 | -5.536384  | -11.732778 |
| H | 5.800504 | -13.709736 | -1.638147  |
| H | 2.263797 | -11.669091 | -3.149441  |
| H | 2.115890 | -13.158378 | -2.198660  |
| H | 4.177881 | -14.375217 | -1.358219  |
| H | 6.527940 | -5.451040  | -13.315203 |
| H | 4.674521 | -8.347367  | -4.518041  |
| H | 5.154185 | -4.902126  | -7.178323  |
| H | 3.452505 | -12.150535 | -0.287642  |
| H | 7.761279 | -4.187207  | -13.218599 |
| H | 7.695179 | -2.528912  | -9.572956  |
| H | 5.100455 | -11.621400 | -0.540850  |
| H | 3.587449 | -3.245613  | -8.301771  |
| H | 7.212153 | -2.438569  | -7.876833  |
| H | 3.735679 | -8.511656  | -2.534757  |
| H | 4.851420 | -2.789297  | -7.136247  |
| H | 4.128685 | -3.332649  | -10.768325 |
| H | 5.602091 | -3.131898  | -12.665324 |
| H | 6.882855 | -2.374470  | -11.716018 |
| H | 6.680787 | -1.178457  | -9.012695  |

|   |           |           |            |
|---|-----------|-----------|------------|
| H | 4.261201  | -1.601830 | -8.299495  |
| H | 4.805952  | -1.700519 | -10.704203 |
| H | -0.071324 | -9.006076 | 4.370371   |

FREE NKX-2593

|   |           |            |           |
|---|-----------|------------|-----------|
| C | -0.101647 | -0.249980  | 1.415086  |
| C | 0.179919  | -5.070605  | -0.350551 |
| C | 0.718386  | -7.548542  | -0.477564 |
| C | -0.706169 | 0.402697   | -0.943603 |
| C | 1.102087  | -13.394569 | -0.705460 |
| C | 0.852477  | -3.769298  | -0.305584 |
| C | 1.053603  | -6.214947  | -0.456003 |
| C | -1.212631 | -5.093455  | -0.297394 |
| C | -1.258681 | -0.129078  | 0.396442  |
| C | -1.346012 | -2.664931  | -0.030014 |
| C | 1.691612  | -8.601423  | -0.571206 |
| C | -1.996096 | -3.921552  | -0.153020 |
| C | -2.019272 | -1.450961  | 0.176026  |
| C | -2.232687 | 0.896145   | 1.011365  |
| C | 2.522317  | -13.390470 | -0.793951 |
| C | 2.837062  | -10.858766 | -0.714865 |
| C | 3.095461  | -8.515265  | -0.651808 |
| C | 3.257449  | -12.211440 | -0.793277 |
| C | 3.156644  | -14.716311 | -0.891913 |
| C | -3.412550 | -3.924268  | -0.107715 |
| C | -3.459557 | -1.497737  | 0.138401  |
| C | 3.722701  | -9.759993  | -0.730839 |
| C | -3.547448 | 0.980108   | 0.263130  |
| C | -4.155936 | -2.763547  | 0.024297  |
| C | -5.685731 | -2.820595  | 0.078388  |
| C | -5.651531 | -0.287446  | 0.095161  |
| C | -6.141951 | -2.926440  | 1.550814  |
| C | -6.266340 | -4.008190  | -0.712290 |
| C | -6.224129 | -1.529425  | -0.565768 |
| O | 0.030335  | -2.633502  | -0.141111 |
| O | 2.059572  | -3.549190  | -0.399040 |
| O | 2.555147  | -15.794036 | -0.899756 |
| O | 4.536174  | -14.662656 | -0.980128 |
| N | -0.077439 | -13.359054 | -0.633611 |
| N | -4.192628 | -0.329490  | 0.203658  |
| S | 1.173188  | -10.277217 | -0.594532 |
| H | 0.009631  | -0.304955  | -1.376683 |
| H | -0.183893 | 1.355863   | -0.782154 |
| H | 0.245600  | 0.759902   | 1.675252  |
| H | -0.440656 | -0.734680  | 2.339426  |
| H | -0.328836 | -7.854610  | -0.414528 |
| H | 0.750221  | -0.809048  | 1.025468  |
| H | -1.498658 | 0.572083   | -1.683736 |
| H | -1.737895 | -6.049554  | -0.359540 |
| H | -1.752701 | 1.884847   | 1.025800  |
| H | 2.108051  | -5.941119  | -0.513256 |
| H | -2.436078 | 0.621100   | 2.057232  |
| H | -3.406472 | 1.374845   | -0.757954 |

|   |           |            |           |
|---|-----------|------------|-----------|
| H | 3.628336  | -7.568477  | -0.652491 |
| H | -3.922470 | -4.883493  | -0.188907 |
| H | 4.338314  | -12.339037 | -0.868689 |
| H | -4.231451 | 1.672133   | 0.775068  |
| H | 4.800402  | -9.899212  | -0.798329 |
| H | 4.832782  | -15.597485 | -1.042201 |
| H | -5.752260 | -2.104272  | 2.164611  |
| H | -5.780721 | -3.862464  | 1.995429  |
| H | -5.912033 | -4.009056  | -1.751630 |
| H | -6.017847 | -4.978709  | -0.265224 |
| H | -5.917057 | 0.604381   | -0.490583 |
| H | -5.969473 | -1.529478  | -1.635487 |
| H | -6.089178 | -0.145211  | 1.097634  |
| H | -7.239441 | -2.915817  | 1.619857  |
| H | -7.362490 | -3.936936  | -0.728004 |
| H | -7.320899 | -1.502780  | -0.492840 |

### ADSORBED NKX-2593

|    |           |            |           |
|----|-----------|------------|-----------|
| Ti | 24.894918 | -10.901165 | 3.695983  |
| Ti | 22.148369 | -10.420974 | 2.972005  |
| Ti | 23.645943 | -7.836113  | 2.673995  |
| Ti | 22.829386 | -10.633209 | 5.686707  |
| Ti | 24.422524 | -4.636921  | 2.434482  |
| Ti | 26.572985 | -8.943694  | 3.357878  |
| Ti | 26.896530 | -6.121060  | 3.470941  |
| Ti | 24.397715 | -8.066712  | 5.595108  |
| Ti | 25.422404 | -4.926428  | 5.846383  |
| O  | 23.478361 | -11.536781 | 2.532803  |
| O  | 26.640222 | -10.861433 | 3.200919  |
| O  | 22.167479 | -8.839159  | 2.058613  |
| O  | 23.333928 | -9.212286  | 6.689730  |
| O  | 21.355361 | -10.962980 | 4.577009  |
| O  | 24.173548 | -11.749629 | 5.269383  |
| O  | 26.222341 | -5.036772  | 2.179986  |
| O  | 25.015938 | -9.165482  | 2.282345  |
| O  | 27.866332 | -7.679723  | 3.068984  |
| O  | 25.434986 | -7.284932  | 3.818879  |
| O  | 27.120090 | -5.273668  | 5.016861  |
| O  | 23.681504 | -6.258343  | 1.822581  |
| O  | 23.008151 | -7.123436  | 4.453984  |
| O  | 24.293979 | -4.668796  | 4.239074  |
| O  | 25.730351 | -9.406905  | 5.018492  |
| O  | 25.397948 | -3.721894  | 6.946127  |
| O  | 24.907274 | -6.681873  | 6.529239  |
| O  | 23.396903 | -9.574107  | 4.163955  |
| O  | 16.918038 | 8.001654   | 1.051030  |
| O  | 16.671275 | 6.106865   | 2.219307  |
| O  | 22.778567 | -3.374594  | 2.109843  |
| O  | 24.795523 | -2.885341  | 1.379344  |
| C  | 14.505665 | 9.195306   | 0.189281  |
| C  | 15.561377 | 10.779186  | 1.843489  |
| C  | 18.640676 | 6.279981   | 0.824843  |
| C  | 19.320336 | 7.159023   | -0.020291 |
| C  | 15.502269 | 10.367932  | 0.356221  |
| C  | 17.555801 | 8.840725   | 0.160584  |
| C  | 17.377228 | 6.724686   | 1.422848  |
| C  | 19.032934 | 4.942666   | 1.192895  |
| C  | 18.817833 | 8.440998   | -0.357922 |
| C  | 16.917077 | 10.045755  | -0.158249 |
| C  | 14.930009 | 11.517397  | -0.497596 |
| C  | 20.122553 | 4.201116   | 0.795090  |
| C  | 19.481189 | 9.362535   | -1.210415 |
| C  | 17.667223 | 10.980272  | -0.955802 |
| C  | 15.887828 | 12.683103  | -0.637676 |
| C  | 18.954210 | 10.608793  | -1.512989 |
| C  | 19.689397 | 11.573423  | -2.448388 |



|   |           |           |           |
|---|-----------|-----------|-----------|
| C | 17.908510 | 13.289321 | -1.897810 |
| C | 21.871864 | -0.739116 | 1.686322  |
| C | 19.175723 | 11.374599 | -3.892667 |
| C | 21.215007 | 11.373767 | -2.435415 |
| C | 19.398930 | 13.005564 | -1.959658 |
| C | 23.107108 | -1.160174 | 1.196042  |
| C | 23.971660 | -0.321837 | 0.438296  |
| C | 23.563717 | -2.498119 | 1.550038  |
| C | 20.323416 | 2.849102  | 1.239559  |
| C | 19.508182 | 2.067804  | 2.088494  |
| C | 19.991129 | 0.775118  | 2.279323  |
| C | 21.201531 | 0.501013  | 1.603330  |
| N | 17.169318 | 12.245540 | -1.186894 |
| N | 24.649034 | 0.400012  | -0.208083 |
| S | 21.719909 | 1.931481  | 0.705177  |
| H | 14.551501 | 8.778754  | -0.825159 |
| H | 14.555638 | 11.034721 | 2.206130  |
| H | 15.942712 | 9.954130  | 2.455550  |
| H | 13.486343 | 9.573835  | 0.348448  |
| H | 18.325514 | 4.475700  | 1.880010  |
| H | 14.677921 | 8.385900  | 0.901139  |
| H | 16.214892 | 11.646205 | 2.005576  |
| H | 20.275406 | 6.853984  | -0.455455 |
| H | 13.989920 | 11.866459 | -0.048822 |
| H | 14.685877 | 11.135601 | -1.499634 |
| H | 16.049814 | 13.188066 | 0.330466  |
| H | 20.864334 | 4.618601  | 0.110510  |
| H | 20.445388 | 9.069096  | -1.624578 |
| H | 15.473092 | 13.436477 | -1.322902 |
| H | 21.346312 | -1.498254 | 2.271660  |
| H | 18.085667 | 11.477311 | -3.965203 |
| H | 21.621286 | 11.428082 | -1.417160 |
| H | 19.431516 | 10.369428 | -4.250815 |
| H | 21.515186 | 10.414370 | -2.874833 |
| H | 19.843014 | 13.142137 | -0.963154 |
| H | 17.728159 | 14.239827 | -1.373778 |
| H | 17.487867 | 13.407934 | -2.911146 |
| H | 19.636349 | 12.105998 | -4.572367 |
| H | 21.692793 | 12.161583 | -3.033615 |
| H | 19.874623 | 13.736768 | -2.627933 |
| H | 23.229782 | -6.142772 | 4.464757  |
| H | 18.593896 | 2.443189  | 2.541510  |
| H | 19.505075 | 0.023234  | 2.898546  |
